# Supplementary material
Source: PubMed Central journal article supplement (PMC7745658)
Supplement: kdd-0006-0309-s01.pdf [file kdd-0006-0309-s01.pdf]

**Figure S1. Chronic kidney disease nomenclature used by KDIGO**

CKD is defined as abnormalities of kidney structure or function, present for >3 months, with implications for health. CKD is classified based on cause, GFR category (G1–G5), and albuminuria category (A1–A3), abbreviated as CGA.

Prognosis of CKD by GFR  
and Albuminuria Categories:  
KDIGO 2012

|                                                                        |     |                                  |       | Persistent albuminuria categories<br>Description and range |                             |                            |
|------------------------------------------------------------------------|-----|----------------------------------|-------|------------------------------------------------------------|-----------------------------|----------------------------|
|                                                                        |     |                                  |       | A1                                                         | A2                          | A3                         |
|                                                                        |     |                                  |       | Normal to mildly increased                                 | Moderately increased        | Severely increased         |
|                                                                        |     |                                  |       | < 30 mg/g<br>< 3 mg/mmol                                   | 30-300 mg/g<br>3-30 mg/mmol | > 300 mg/g<br>> 30 mg/mmol |
| GFR categories (ml/min/ 1.73 m <sup>2</sup> )<br>Description and range | G1  | Normal or high                   | ≥ 90  |                                                            |                             |                            |
|                                                                        | G2  | Mildly decreased                 | 60-89 |                                                            |                             |                            |
|                                                                        | G3a | Mildly to moderately decreased   | 45-59 |                                                            |                             |                            |
|                                                                        | G3b | Moderately to severely decreased | 30-44 |                                                            |                             |                            |
|                                                                        | G4  | Severely decreased               | 15-29 |                                                            |                             |                            |
|                                                                        | G5  | Kidney failure                   | < 15  |                                                            |                             |                            |

Green: low risk (if no other markers of kidney disease, no CKD); Yellow: moderately increased risk; Orange: high risk; Red, very high risk.
